# Supplementary material for: Hybridization underlies localized trait evolution in cavefish
Source: PubMed Central journal article supplement — iScience. 2022 Jan 15;25(2):103778. doi: 10.1016/j.isci.2022.103778 (PMC8819016; doi:10.1016/j.isci.2022.103778), 2022-01-15
Supplement: mmc1.pdf [file mmc1.pdf]

**iScience, Volume 25**

**Supplemental information**

**Hybridization underlies localized**

**trait evolution in cavefish**

**Rachel L. Moran, James B. Jaggard, Emma Y. Roback, Alexander Kenzior, Nicolas Rohner, Johanna E. Kowalko, Claudia Patricia Ornelas-García, Suzanne E. McGaugh, and Alex C. Keene**

1 **Table S1. Population genetic summary statistics, Related to Figure 2 and STAR Methods.**  
 2 Population sample sizes, nucleotide diversity (Pi) within populations, absolute genetic divergence  
 3 (Dxy) between populations, and relative genetic divergence (Fst) between populations.

| <u>Diversity within populations</u> |          |           | <u>Divergence between populations</u> |                     |            |            |
|-------------------------------------|----------|-----------|---------------------------------------|---------------------|------------|------------|
| <b>Population</b>                   | <b>n</b> | <b>Pi</b> | <b>Population 1</b>                   | <b>Population 2</b> | <b>Dxy</b> | <b>Fst</b> |
| Chica Pool 1                        | 5        | 0.0021    | Chica Pool1                           | Chica Pool2         | 0.0021     | 0.0000     |
| Chica Pool 2                        | 14*      | 0.0021    | Chica Pool1                           | Río Choy            | 0.0033     | 0.1440     |
| Río Choy                            | 9        | 0.0028    | Chica Pool1                           | Pachón              | 0.0030     | 0.3501     |
| Pachón                              | 10       | 0.0008    | Chica Pool1                           | Rascón              | 0.0030     | 0.2592     |
| Rascón                              | 10       | 0.0013    | Chica Pool1                           | Los Sabinos         | 0.0024     | 0.2029     |
| Los Sabinos                         | 3        | 0.0007    | Chica Pool1                           | Tinaja              | 0.0024     | 0.2364     |
| Tinaja                              | 8        | 0.0008    | Chica Pool2                           | Río Choy            | 0.0033     | 0.1651     |
|                                     |          |           | Chica Pool2                           | Pachón              | 0.0030     | 0.3693     |
|                                     |          |           | Chica Pool2                           | Rascón              | 0.0030     | 0.2923     |
|                                     |          |           | Chica Pool2                           | Los Sabinos         | 0.0024     | 0.1154     |
|                                     |          |           | Chica Pool2                           | Tinaja              | 0.0024     | 0.2477     |
|                                     |          |           | Río Choy                              | Pachón              | 0.0035     | 0.3654     |
|                                     |          |           | Río Choy                              | Rascón              | 0.0033     | 0.2507     |
|                                     |          |           | Río Choy                              | Sabinos             | 0.0034     | 0.1900     |
|                                     |          |           | Río Choy                              | Tinaja              | 0.0034     | 0.3555     |
|                                     |          |           | Pachón                                | Rascón              | 0.0026     | 0.4572     |
|                                     |          |           | Pachón                                | Los Sabinos         | 0.0020     | 0.2832     |
|                                     |          |           | Pachón                                | Tinaja              | 0.0020     | 0.4430     |
|                                     |          |           | Rascón                                | Los Sabinos         | 0.0023     | 0.2002     |
|                                     |          |           | Rascón                                | Tinaja              | 0.0023     | 0.4003     |
|                                     |          |           | Los Sabinos                           | Tinaja              | 0.0008     | 0.0164     |

4 \*Note: Chica Pool 2 had a sample size of 14 for genomic analyses but a sample size of 15 for  
 5 morphological and sleep analyses (one individual died before a tissue sample was collected for  
 6 sequencing).

7 **Table S2. Results of D statistic and f4 ratio tests for introgression, Related to Figure 2. A.**  
 8 *aeneus* served as the outgroup. BBAA = derived alleles shared by P1 and P2. ABBA = derived  
 9 alleles shared by P2 and P3. BABA = derived alleles shared by P1 and P3. Significant p-values  
 10 (< 0.05) indicate evidence of introgression between Choy, Chica, Rascón, and Tinaja.

11

| P1       | P2     | P3       | D statistic | Z score | p-value  | f4 ratio | BBAA    | ABBA    | BABA    |
|----------|--------|----------|-------------|---------|----------|----------|---------|---------|---------|
| Río Choy | Chica  | Rascón   | 0.27893     | 21.4698 | < 0.0001 | 0.173087 | 8409.82 | 4100.59 | 2311.94 |
| Río Choy | Tinaja | Chica    | 0.14629     | 7.98383 | < 0.0001 | 0.262394 | 2195.94 | 9381.5  | 6986.95 |
| Chica    | Tinaja | Rascón   | 0.409914    | 33.6245 | < 0.0001 | 0.230212 | 8116.3  | 3375    | 1412.52 |
| Rascón   | Tinaja | Río Choy | 0.2558      | 23.5379 | < 0.0001 | 0.11872  | 5652.15 | 3207.89 | 1901.03 |

12

13

14

15

16

17

18

19

20

21

22

23

24

25

26

27 **Table S3. Summary of ancestry analysis in hybrid individuals from Chica Pool 1 and Pool**  
 28 **2, Related to Figure 2.** Mean minor parent (i.e. surface) tract lengths and mean major parent (i.e.  
 29 cave) global ancestry proportions were used to infer the timing since admixture ( $T_{\text{admixture}}$ ), summary  
 30 statistics for minor parent ancestry tract lengths in base pair, and estimated mean  $\pm$  SE number  
 31 of generations since the onset of admixture ( $T_{\text{admixture}}$ ) in Chica cave Pool 1 (n = 5) and Pool 2 (n =  
 32 14).

33

| <b>Pool</b> | <b>ID</b>  | <b>MeanSurface<br/>TractLengthBP</b> | <b>MeanSurfaceTract<br/>LengthMorgans</b> | <b>MeanCaveGlobal<br/>Ancestry</b> | <b><math>T_{\text{admixture}}</math></b> |
|-------------|------------|--------------------------------------|-------------------------------------------|------------------------------------|------------------------------------------|
| 1           | Chica5_1   | 47096.4                              | 0.000546                                  | 0.770                              | 2377.275                                 |
| 1           | Chica5_2   | 49508.8                              | 0.000574                                  | 0.759                              | 2294.262                                 |
| 1           | Chica5_3   | 49475.3                              | 0.000574                                  | 0.750                              | 2324.321                                 |
| 1           | Chica5_4   | 51214.4                              | 0.000594                                  | 0.744                              | 2261.418                                 |
| 1           | Chica5_5   | 49574.2                              | 0.000575                                  | 0.751                              | 2315.212                                 |
| 2           | Chica1_1   | 51893.7                              | 0.000602                                  | 0.739                              | 2246.508                                 |
| 2           | Chica1_10  | 48084.2                              | 0.000558                                  | 0.755                              | 2374.725                                 |
| 2           | Chica1_11  | 48674.3                              | 0.000565                                  | 0.762                              | 2323.384                                 |
| 2           | Chica1_12  | 47755.7                              | 0.000554                                  | 0.755                              | 2389.959                                 |
| 2           | Chica1_13  | 51812.5                              | 0.000601                                  | 0.768                              | 2166.720                                 |
| 2           | Chica1_14  | 52055.8                              | 0.000604                                  | 0.755                              | 2193.243                                 |
| 2           | Chica1_2   | 50207.8                              | 0.000582                                  | 0.761                              | 2257.289                                 |
| 2           | Chica1_3   | 48756.4                              | 0.000566                                  | 0.754                              | 2343.562                                 |
| 2           | Chica1_4   | 49882.2                              | 0.000579                                  | 0.755                              | 2289.383                                 |
| 2           | Chica1_5   | 48534.3                              | 0.000563                                  | 0.767                              | 2315.360                                 |
| 2           | Chica1_6   | 49014.7                              | 0.000569                                  | 0.773                              | 2276.677                                 |
| 2           | Chica1_7   | 48674.4                              | 0.000565                                  | 0.755                              | 2345.607                                 |
| 2           | Chica1_8   | 49867.9                              | 0.000578                                  | 0.741                              | 2333.061                                 |
| 2           | Chica1_9   | 51125.9                              | 0.000593                                  | 0.745                              | 2262.986                                 |
| <b>Pool</b> | <b>Min</b> | <b>Max</b>                           | <b>Median</b>                             | <b>Mean</b>                        | <b>SE</b>                                |
| 1           | 1,350      | 2,069,769                            | 29,372                                    | 48,042                             | 263                                      |
| 2           | 1,031      | 2,077,917                            | 29,561                                    | 48,435                             | 162                                      |

34

35

36

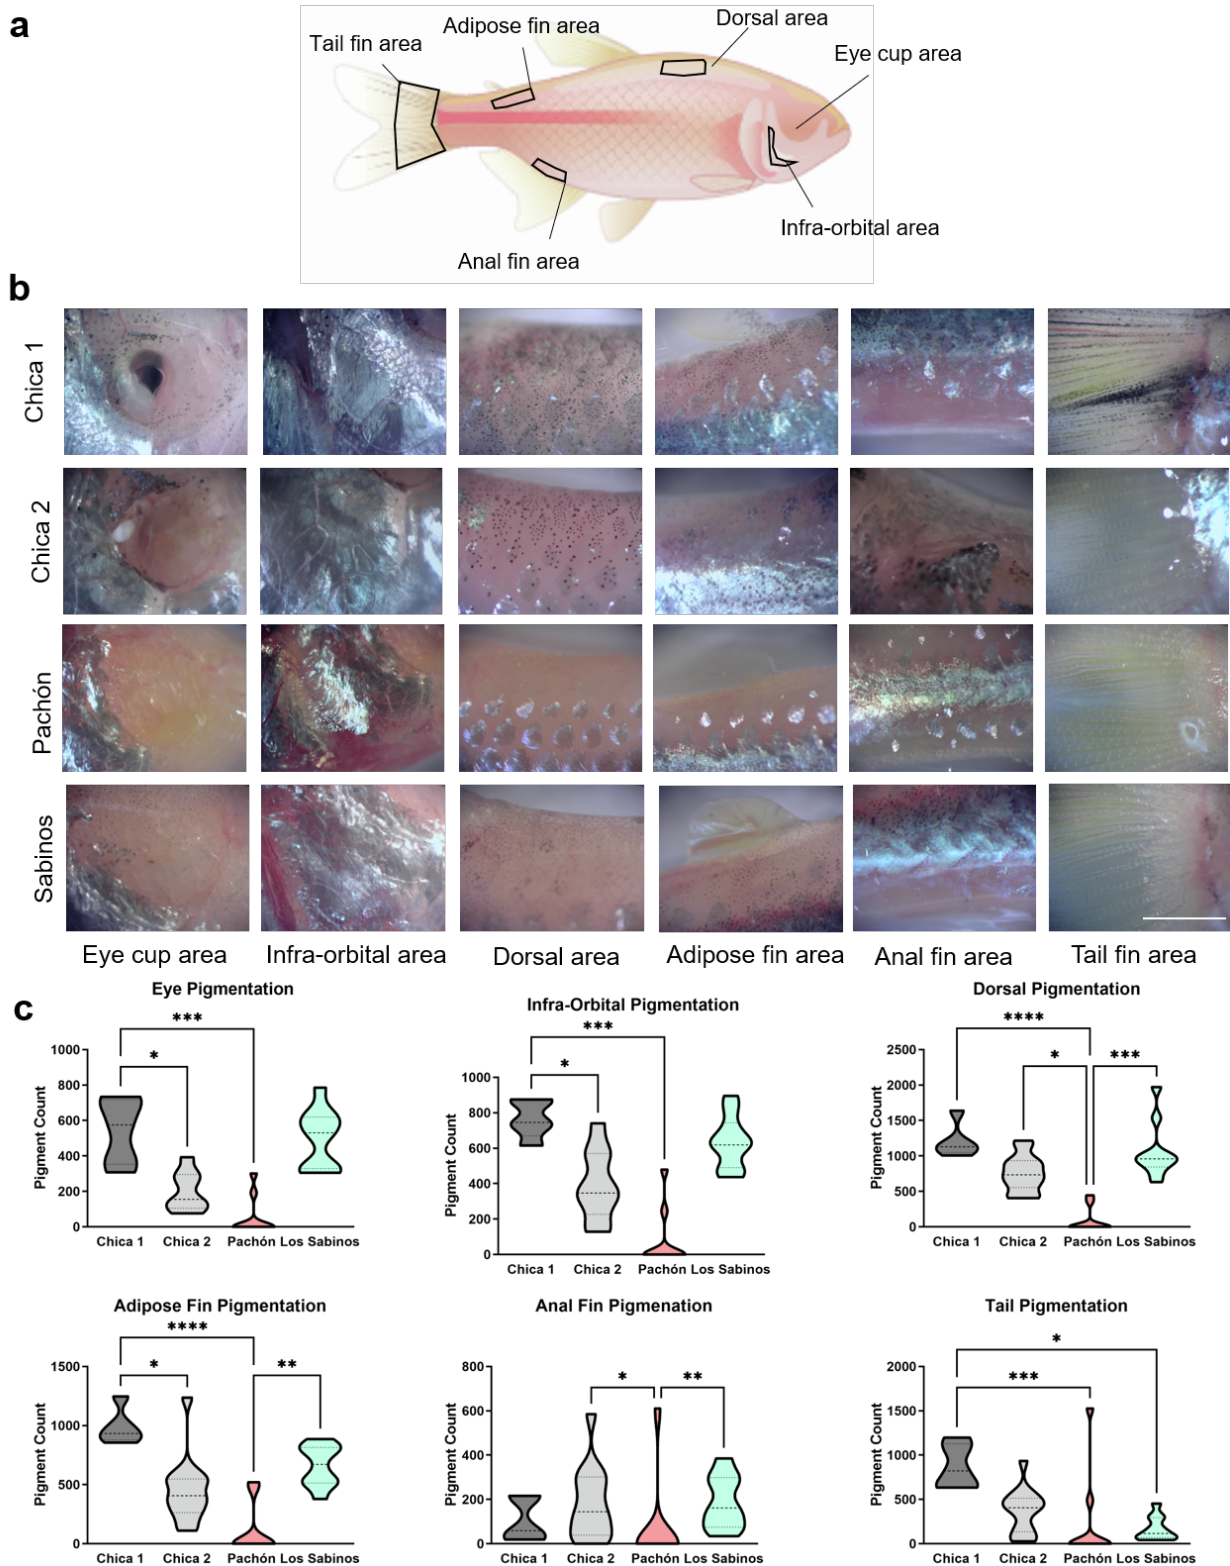

37

38 **Figure S1. Eye and pigment morphology variations among cave populations, Related to**

39 **Figure 1. (A) Diagram of areas used for pigmentation quantifications. (B) Brightfield images of**

40 fish bodies showing pigmentation across multiple cave populations. (C) Pigment count  
41 quantifications by area. Eye cup: Kruskal-Wallis test,  $p < 0.001$ , KW statistic = 24.28. Chica Pool  
42 1 vs. Chica Pool 2,  $p < 0.05$ ; Chica Pool 1 vs. Pachón,  $p < 0.001$ . Infra-Orbnital: Kruskal-Wallis  
43 test,  $p < 0.001$ , KW statistic = 22.70. Chica Pool 1 vs. Chica Pool 2,  $p < 0.05$ ; Chica Pool 1 vs.  
44 Pachón,  $p < 0.001$ . Dorsal area: Kruskal-Wallis test,  $p < 0.001$ , KW statistic = 25.66. Chica Pool  
45 1 vs. Pachón,  $p < 0.001$ ; Chica Pool 2 vs. Pachón,  $p < 0.05$ ; Pachón vs. Los Sabinos,  $p < 0.001$ .  
46 Adipose area: Kruskal-Wallis test,  $p < 0.001$ , KW statistic = 23.65. Chica Pool 1 vs. Chica Pool 2,  
47  $p < 0.05$ ; Chica Pool 1 vs. Pachón,  $p < 0.001$ , Pachón vs. Los Sabinos,  $p < 0.01$ . Anal fin: Kruskal-  
48 Wallis test,  $p < 0.01$ , KW statistic = 12.44. Chica Pool 2 vs. Pachón,  $p < 0.05$ , Pachón vs. Los  
49 Sabinos,  $p < 0.01$ . Tail area: Kruskal-Wallis test,  $p < 0.001$ , KW statistic = 16.87. Chica Pool 1 vs.  
50 Pachón,  $p < 0.001$ , Chica Pool 1 vs. Los Sabinos,  $p < 0.05$ .

51

52

53

54

55

56

57

58

59

60

61

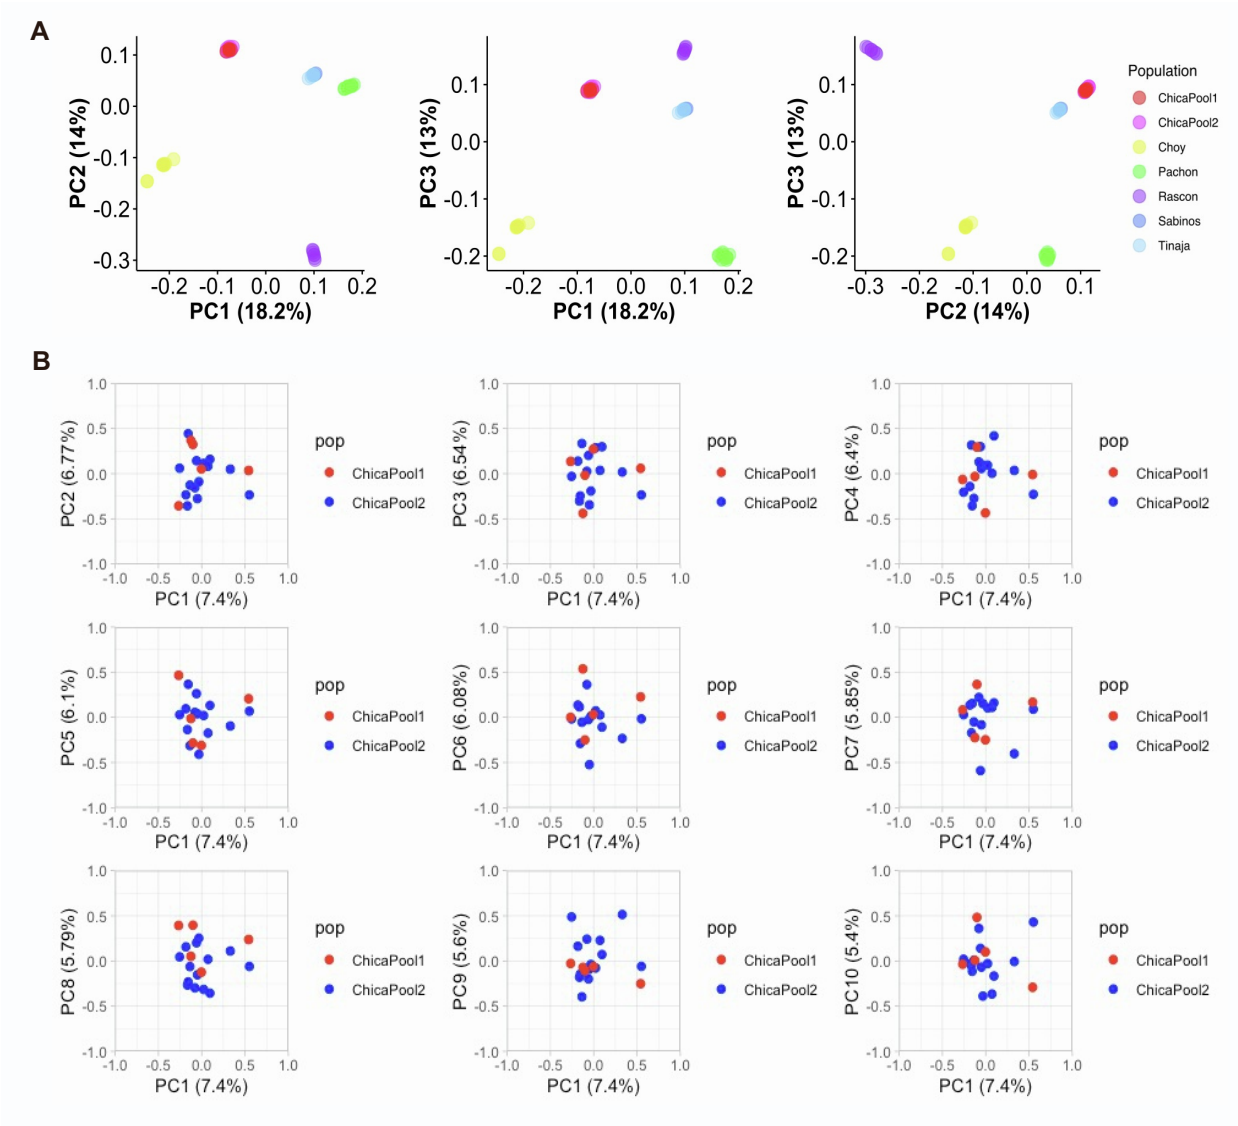

62

63 **Figure S2. Visualization of PCA analyses, Related to Figure 1.** (A) Biplots of scores for the  
 64 first three PCs from the PCA on SNPs from cave (Chica, Pachón, Tinaja, Los Sabinos) and  
 65 surface (Río Choy and Rascón) populations. Note that individuals from Chica Pool 1 and Pool 2  
 66 overlap and individuals from Tinaja and Los Sabinos overlap. (B) Biplots of PCs 1-10 for PCA  
 67 including only Chica Pools 1 and 2. Note overlap of individuals from both pools.

68

69



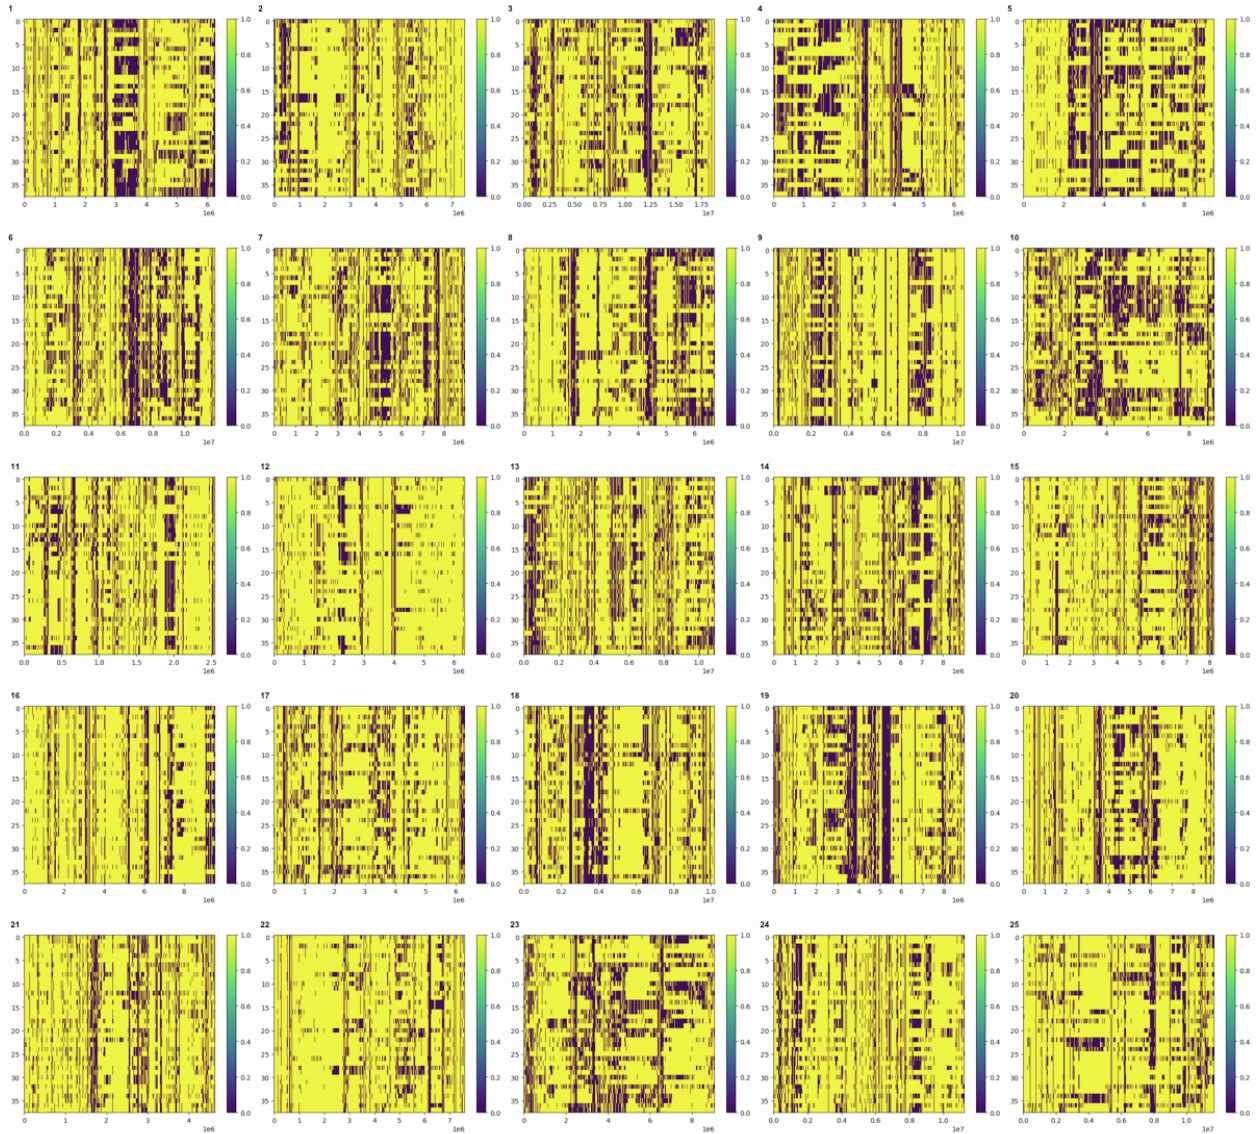

70

71 **Figure S3. Visualization of local ancestry mapping in fish from Chica Pool 1 and Pool 2,**  
 72 **Related to Figure 2.** Local ancestry tracts in Chica samples inferred using a Hidden Markov  
 73 Model approach along each of the 25 chromosomes. Yellow represents cave ancestry and purple  
 74 represents surface ancestry. The y axis shows haplotypes 1 - 38, with haplotypes 0 - 27  
 75 corresponding to Chica Pool 2 (n = 14 diploid individuals), and haplotypes 28 - 38 corresponding  
 76 to Chica Pool 1 (n = 5 diploid individuals). The x axis shows bp position along each chromosome.

77



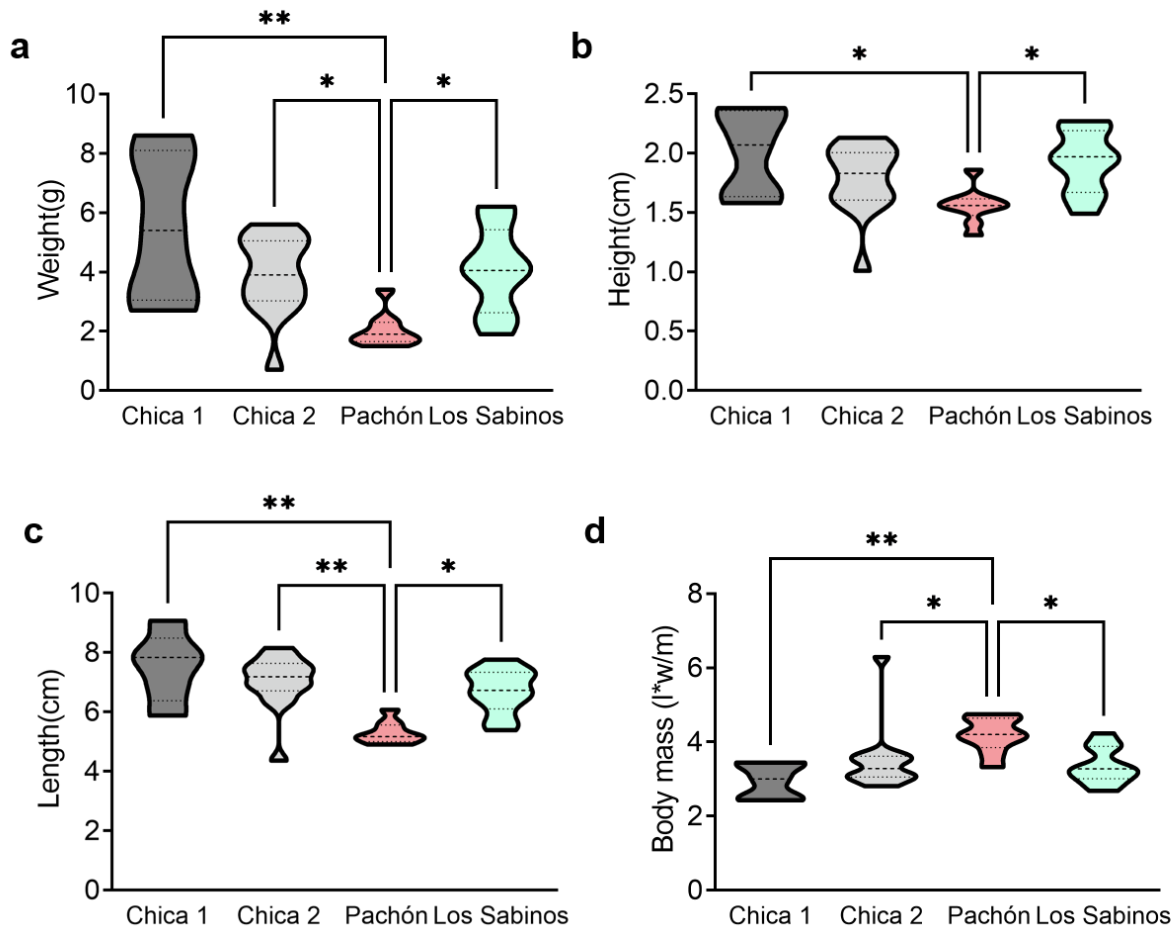

79

80 **Figure S4. Physical morphology in cave populations of *A. mexicanus*, Related to Figure**

81 **1. (A) Pachón cavefish weigh significantly less than Chica Pool 1 and 2 and Los Sabinos**

82 Kruskal-Wallis test,  $p < 0.01$ , KW statistic = 15.19. Chica Pool 1 vs. Pachón,  $p < 0.01$ ; Chica

83 Pool 2 vs. Pachón,  $p < 0.05$ , Pachón vs. Los Sabinos,  $p < 0.05$ . (B) Body height from dorsal fin

84 to stomach is smaller in Pachón cavefish compared to Chica Pool 1 and Pool 2 as well as Los

85 Sabinos. Kruskal-Wallis test,  $p < 0.01$ , KW statistic = 11.90. Chica Pool 1 vs. Pachón,  $p < 0.05$ ;

86 Pachón vs. Los Sabinos,  $p < 0.05$ . (C) Body length measured from mouth to tail is significantly

87 smaller in Pachón cavefish compared to all other cave populations. Kruskal-Wallis test,  $p <$

88 0.001, KW statistic = 17.84. Chica Pool 1 vs. Pachón,  $p < 0.01$ ; Chica Pool 2 vs. Pachón,  $p <$

89 0.01, Pachón vs. Los Sabinos,  $p < 0.05$ . (D) Body mass is significantly larger in Pachón

- 90 cavefish compared to other populations Kruskal-Wallis test,  $p < 0.01$ , KW statistic = 14.41.
- 91 Chica Pool 1 vs. Pachón,  $p < 0.01$ ; Chica Pool 2 vs. Pachón,  $p < 0.05$ , Pachón vs. Los Sabinos,
- 92  $p < 0.05$ .
